# Supplementary material
Source: PubMed Central journal article supplement (PMC2844226)

## Supplemental Figure Legends

**Figure S1. Effect of TRIM expression on cell morphology.** HEK293T cells were transfected with plasmid vectors expressing various TRIM family proteins (4, 5 $\alpha$ , 14, 25, 28, 29, 32, and 54) and morphological changes were observed under microscope at 48 h post-transfection. Hu, human; Rh, rhesus monkey; delB30.2, TRIM5 $\alpha$  with the B30.2 domain deleted; AGM, African green monkey.

**Figure S2. Effect of TRIM5 $\alpha$  expression on cell viability, total protein levels, and caspase-3 activity.** HEK293T cells were transfected with an empty vector control or plasmid expressing human (Hu), rhesus monkey (Rh), or African green monkey (AGM) TRIM5 $\alpha$ . At 48 h post-transfection, cell viability (*A*), total protein levels (*B*), or caspase-3 activity (*C*) was measured using the MTT Assay Kit (Invitrogen), DC Protein Assay Kit (Bio-Rad), or Caspase-3 Assay Kit (MBL International), respectively. When indicated, the cells were treated with staurosporin (10 $\mu$ M) for 18 h or camptothecin (12  $\mu$ M) for 5 h to induce an apoptosis. Data are expressed as the mean  $\pm$  S.D. of three independent experiments.

**Figure S1**

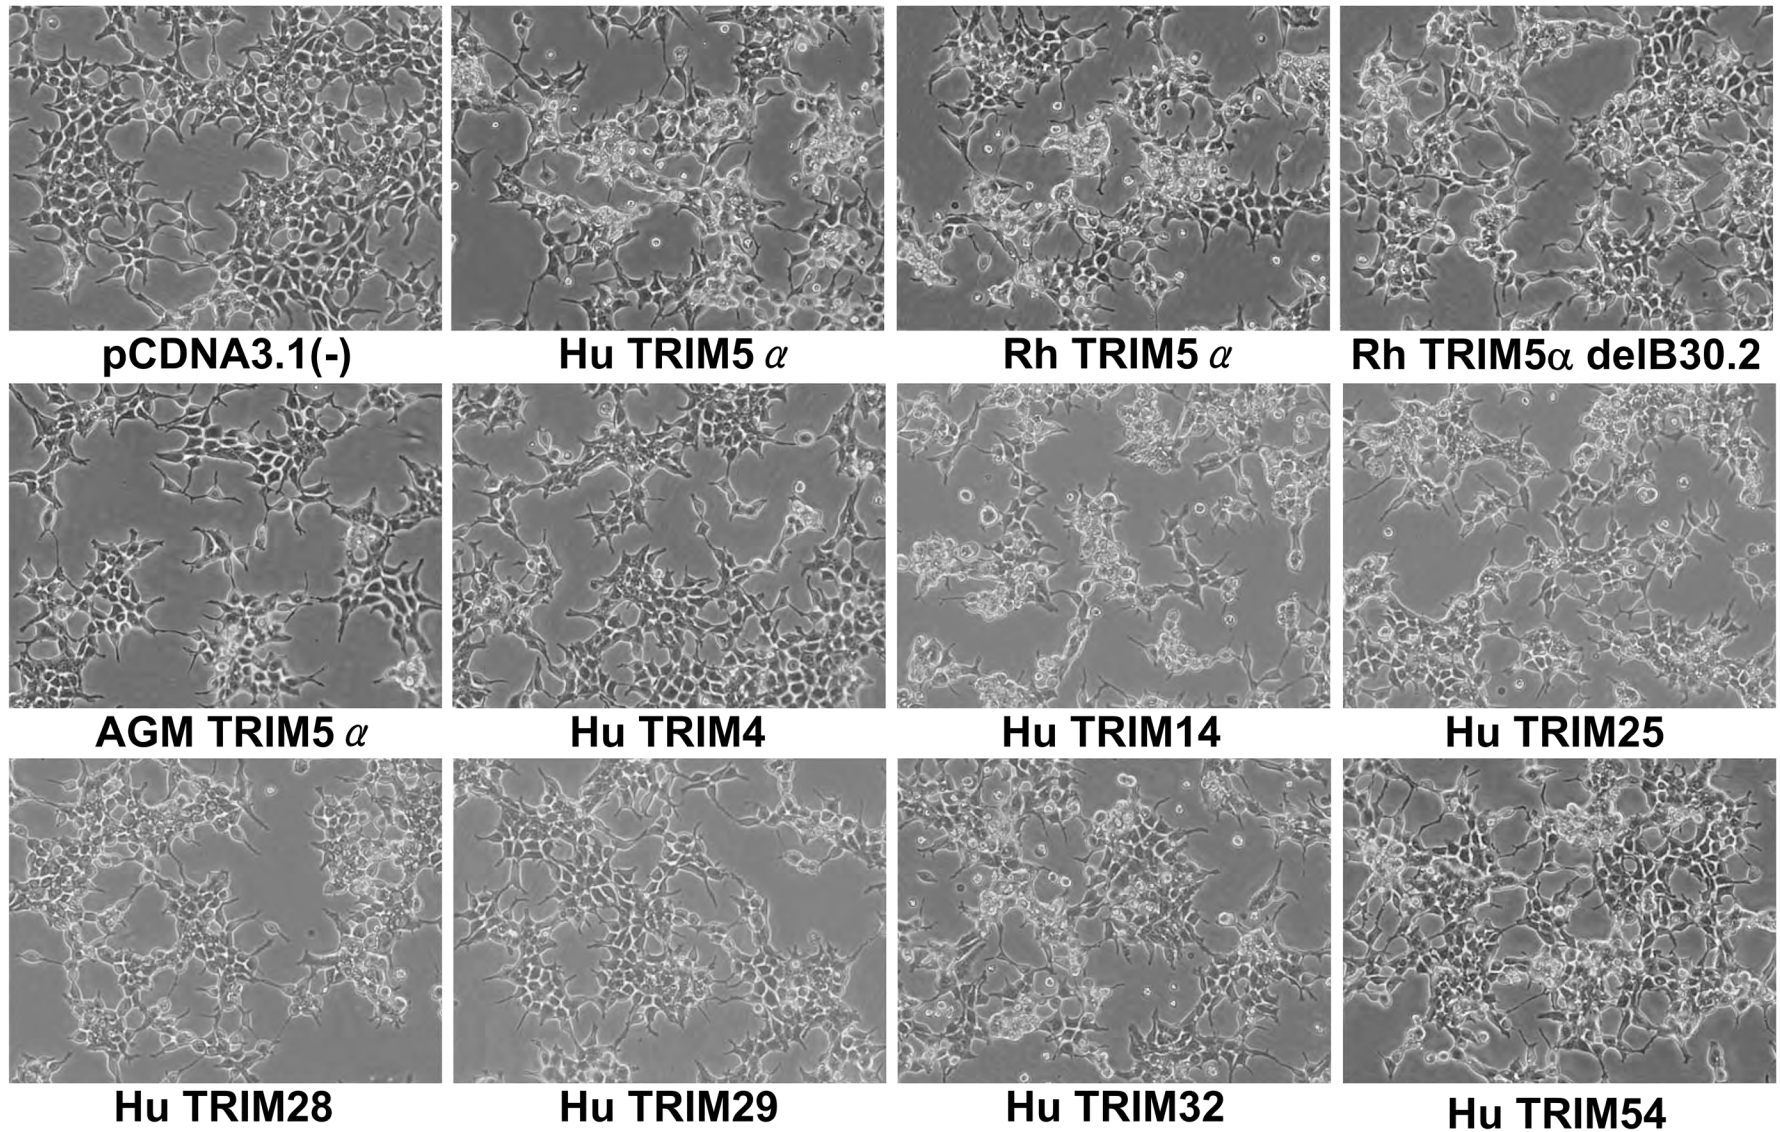

Figure S2

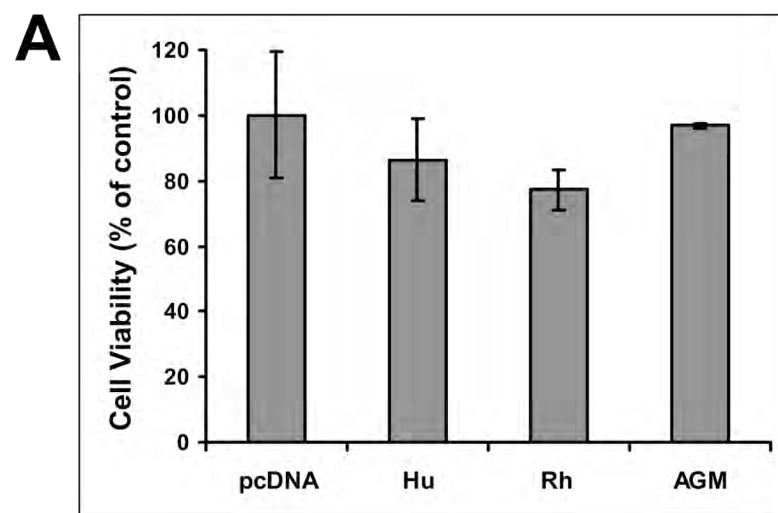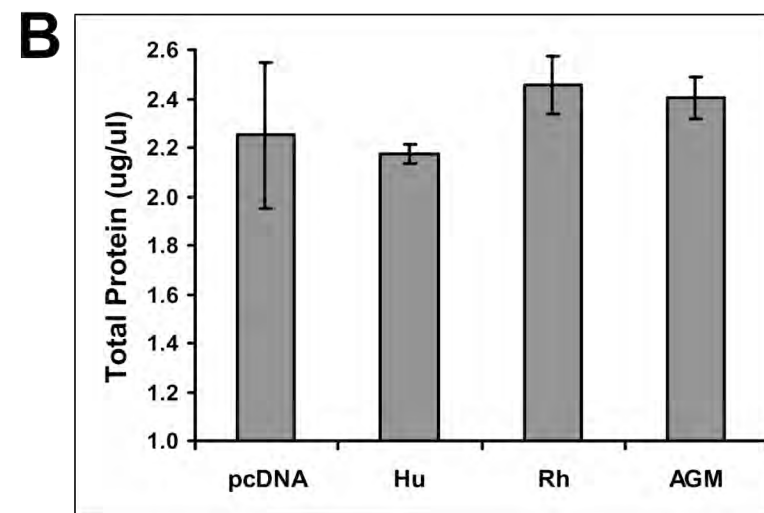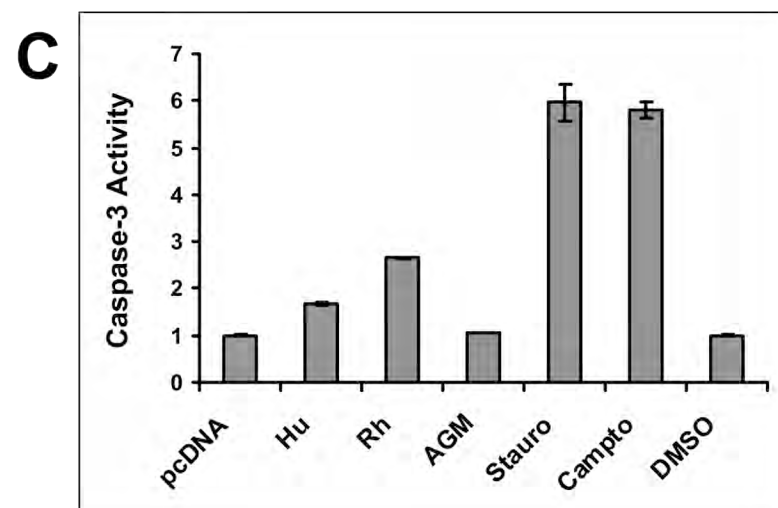

Supplement: supp_M109.040618_jbc.M109.040618-1.pdf [file supp_M109.040618_jbc.M109.040618-1.pdf]
